# Supplementary material for: Diagnostic Accuracy of the Explicit Diagnostic Criteria for Transient Ischemic Attack: A Validation Study
Source: PubMed Central journal article supplement — Stroke. 2019 Jun 20;50(8):2080–5. doi: 10.1161/STROKEAHA.119.025626 (PMC6661246; doi:10.1161/strokeaha.119.025626), 2019-06-20
Supplement: str-50-2080-s001.pdf [file str-50-2080-s001.pdf]

## **Supplemental material**

### **Standardized questionnaire by the research nurse**

This concerns a translated version of the subpart of the case report form on signs and symptoms. Items such as relevant past medical history, cardiovascular risk factors and current medication are excluded here.

For the assessment of the Explicit Diagnostic Criteria for TIA (EDCT) the researchers used the data from this questionnaire, but also the correspondence of the GP and neurologist.

## Patient's narrative of signs and symptoms

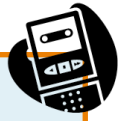

'Can you describe in your own words the symptoms for which you consulted the GP?'

--- The response to (only) this question will be recorded ---

### Course of symptoms

- The start of symptoms was:
  - sudden
  - gradually
- Total duration of symptoms:  h  min
- Did the participant feel the symptoms coming or did they come unexpectedly?
  - He/she felt symptoms coming
  - Symptoms came unexpectedly
- Were there any signs or symptoms preceding the (possible) neurological deficits?
  - No
  - Yes, namely: \_\_\_\_\_  
\_\_\_\_\_  
\_\_\_\_\_
- Were symptoms immediately there in full intensity or did they get worse over time?
  - Onset of symptoms in full intensity
  - Symptoms got worse over time
- Does the participant fully remember the signs and symptoms?  Yes  No
- Has the participant experienced the symptoms (suspected of a TIA) before?  Yes  No  
If yes, when? \_\_\_\_\_  
\_\_\_\_\_  
\_\_\_\_\_
- How many times?

**Were the following signs and symptoms present?**

|                                                                                                                                                                                                                                                                                                                                                    |                                                                                                                                                                              |
|----------------------------------------------------------------------------------------------------------------------------------------------------------------------------------------------------------------------------------------------------------------------------------------------------------------------------------------------------|------------------------------------------------------------------------------------------------------------------------------------------------------------------------------|
| Total or partial loss of strength (motor deficit) in arm/hand, leg/foot or face<br><br>If yes: Unilateral<br>Bilateral                                                                                                                                                                                                                             | <input type="checkbox"/> Yes <input type="checkbox"/> No<br><br><input type="checkbox"/><br><input type="checkbox"/>                                                         |
| Numbness/tingling sensation (sensory deficit) in arm/hand, leg/foot, or face<br><br>If yes: Unilateral<br>Bilateral                                                                                                                                                                                                                                | <input type="checkbox"/> Yes <input type="checkbox"/> No<br><br><input type="checkbox"/><br><input type="checkbox"/>                                                         |
| Vision problem/impaired vision<br><br>If yes; this concerned: <ul style="list-style-type: none"> <li>❖ Diplopia</li> <li>❖ Blurred vision (both eyes)</li> <li>❖ Loss of vision/blindness in one part of visual field (both eyes)</li> <li>❖ Loss of vision/blindness in one eye (amaurosis fugax); as a shade coming down over the eye</li> </ul> | <input type="checkbox"/> Yes <input type="checkbox"/> No<br><br><input type="checkbox"/><br><input type="checkbox"/><br><input type="checkbox"/><br><input type="checkbox"/> |
| Seeing flashes, sparkles, stars or other visual phenomena                                                                                                                                                                                                                                                                                          | <input type="checkbox"/> Yes <input type="checkbox"/> No                                                                                                                     |
| Communication problem<br><br>If yes; this concerned: <ul style="list-style-type: none"> <li>❖ Incoherent language, trouble finding words, strange sentences or words, trouble understanding language (dysphasia)</li> <li>❖ Problems with articulation and pronouncing words (dysarthria)</li> </ul>                                               | <input type="checkbox"/> Yes <input type="checkbox"/> No<br><br><input type="checkbox"/><br><input type="checkbox"/>                                                         |
| Spinning sensation/true vertigo                                                                                                                                                                                                                                                                                                                    | <input type="checkbox"/> Yes <input type="checkbox"/> No                                                                                                                     |
| Lightheadedness                                                                                                                                                                                                                                                                                                                                    | <input type="checkbox"/> Yes <input type="checkbox"/> No                                                                                                                     |
| Feeling like one might black-out/faint (presyncope)                                                                                                                                                                                                                                                                                                | <input type="checkbox"/> Yes <input type="checkbox"/> No                                                                                                                     |
| Loss of consciousness                                                                                                                                                                                                                                                                                                                              | <input type="checkbox"/> Yes <input type="checkbox"/> No                                                                                                                     |
| Loss of short-term memory, without loss of consciousness                                                                                                                                                                                                                                                                                           | <input type="checkbox"/> Yes <input type="checkbox"/> No                                                                                                                     |
| Being adrift, unsteady gait, disturbed coordination (ataxia)                                                                                                                                                                                                                                                                                       | <input type="checkbox"/> Yes <input type="checkbox"/> No                                                                                                                     |
| Swallowing problem/choking<br>Needs to be distinguished from:<br>Globus sensation                                                                                                                                                                                                                                                                  | <input type="checkbox"/> Yes <input type="checkbox"/> No<br><br><input type="checkbox"/> Yes <input type="checkbox"/> No                                                     |
| Muscle contractions or spasms                                                                                                                                                                                                                                                                                                                      | <input type="checkbox"/> Yes <input type="checkbox"/> No                                                                                                                     |
| Sudden fall to the ground (drop attack)                                                                                                                                                                                                                                                                                                            | <input type="checkbox"/> Yes <input type="checkbox"/> No                                                                                                                     |
| Headache                                                                                                                                                                                                                                                                                                                                           | <input type="checkbox"/> Yes <input type="checkbox"/> No                                                                                                                     |
| Nausea and/or vomiting                                                                                                                                                                                                                                                                                                                             | <input type="checkbox"/> Yes <input type="checkbox"/> No                                                                                                                     |
| Pain or tightness on the chest                                                                                                                                                                                                                                                                                                                     | <input type="checkbox"/> Yes <input type="checkbox"/> No                                                                                                                     |
| Shortness of breath                                                                                                                                                                                                                                                                                                                                | <input type="checkbox"/> Yes <input type="checkbox"/> No                                                                                                                     |
| Palpitations, irregular heartbeat                                                                                                                                                                                                                                                                                                                  | <input type="checkbox"/> Yes <input type="checkbox"/> No                                                                                                                     |
| Other relevant symptoms?<br>_____<br>_____<br>_____<br>_____                                                                                                                                                                                                                                                                                       | <input type="checkbox"/> Yes <input type="checkbox"/> No                                                                                                                     |
